# Supplementary material
Source: PubMed Central journal article supplement (PMC2493077)
Supplement: jlb.1207847_1.pdf [file jlb.1207847_1.pdf]

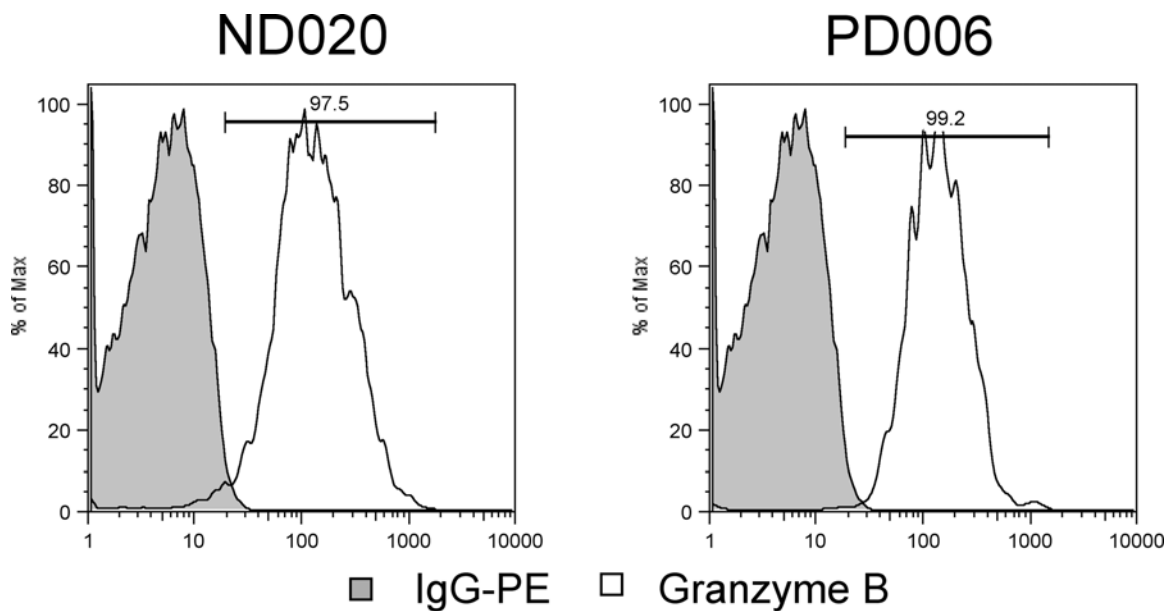

IPP stimulated  $V\gamma 2$  cells from HIV+ donors acquire granzyme B expression. PBMC from HIV+ or control donors were expanded with IPP and IL2 for 14 days, cells were stained for flow cytometry before and after expansion with antibodies against  $V\gamma 2$ , GrB, CD27, and CD45RA. Shown are representative plots of Granzyme B (+ isotype control) in  $V\gamma 2^+$  cells on day 14 of the culture. While there are significant differences in post-expansion frequency of  $V\gamma 2^+$  cells between HIV+ and control donors, no differences in GrB expression in  $V\gamma 2^+$  cells was observed (summarized in Table 2).

# Supplemental Table 1

| Group                            | Sample ID       | Frequency of GrB+ Cells Among Vg2- |               |               |               |               | Frequency of GrB+ Cells Among Vg2+ |               |               |               |              |     |
|----------------------------------|-----------------|------------------------------------|---------------|---------------|---------------|---------------|------------------------------------|---------------|---------------|---------------|--------------|-----|
|                                  |                 | Total Vg2-                         | CD27+/RA+     | CD27+ /RA-    | CD27- /RA-    | CD27- /RA+    | Total Vg2+                         | CD27 +/RA+    | CD27+ /RA-    | CD27- /RA-    | CD27- /RA+   |     |
| Control                          | ND001           | 28.9                               | 10.7          | 12.6          | 25.1          | 55.3          | 72.8                               | 82.7          | 48.8          | 75.8          | 86.1         |     |
|                                  | ND003           | 28.2                               | 9.7           | 13.9          | 28.2          | 67.3          | 73.6                               | 76.3          | 68.8          | 77.4          | 91.7         |     |
|                                  | ND004           | 46.8                               | 7.5           | 6.4           | 67.8          | 71            | 53.4                               | 45.4          | 36.7          | 66.1          | 80.6         |     |
|                                  | ND005           | 12.7                               | 8.2           | 4.4           | 12            | 31.4          | 64.3                               | 81.3          | 44.2          | 68.1          | 95.7         |     |
|                                  | ND006           | 46.4                               | 53.6          | 47.9          | 31.7          | 29.2          | 45.3                               | 50.9          | 41.3          | 50.4          | 38.9         |     |
|                                  | ND008           | 12.3                               | 3.4           | 6.2           | 33            | 30.9          | 81.8                               | 83.5          | 70.3          | 81.3          | 88           |     |
|                                  | ND012           | 44.5                               | 7.4           | 11            | 54.4          | 68.6          | 35.9                               | 41.5          | 32            | 41.3          | 52.3         |     |
|                                  | ND013           | 30.7                               | 9.9           | 9.7           | 34.6          | 72.7          | 75.2                               | 70.1          | 58            | 74.4          | 89.7         |     |
|                                  | ND014           | 36.8                               | 4.5           | 2.7           | 12.4          | 75.1          | 68.1                               | 30            | 4.8           | 2.4           | 86.7         |     |
|                                  | ND015           | 11.8                               | 4.1           | 9.3           | 26            | 27.2          | 77.5                               | 78.5          | 75.6          | 81.6          | 90           |     |
|                                  | ND016           | 27.7                               | 4.3           | 6.6           | 65.6          | 60.5          | 59.7                               | 66.7          | 51.8          | 77.6          | 75           |     |
|                                  | ND017           | 23.2                               | 18.4          | 6.9           | 22.4          | 57.2          | 47.8                               | 67.1          | 24.6          | 47.7          | 74           |     |
|                                  | ND018           | 20.8                               | 4.3           | 4.4           | 53.8          | 51            | 45.9                               | 42.9          | 33            | 64.3          | 92.3         |     |
|                                  | ND019           | 24.3                               | 3.6           | 2.2           | 25.7          | 66.1          | 86.9                               | 92.7          | 50.3          | 87.5          | 97.7         |     |
|                                  | ND020           | 9.1                                | 2.5           | 3.3           | 9.6           | 53.5          | 34.1                               | 57.8          | 26.2          | 29.2          | 100          |     |
|                                  | <b>Averages</b> | <b>26.95</b>                       | <b>10.14</b>  | <b>9.83</b>   | <b>33.49</b>  | <b>54.47</b>  | <b>61.49</b>                       | <b>64.49</b>  | <b>44.43</b>  | <b>61.67</b>  | <b>82.58</b> |     |
|                                  | <b>StDev</b>    | <b>12.60</b>                       | <b>12.70</b>  | <b>11.12</b>  | <b>18.67</b>  | <b>17.03</b>  | <b>16.89</b>                       | <b>18.76</b>  | <b>19.23</b>  | <b>23.43</b>  | <b>16.92</b> |     |
|                                  | HIV+            | PD001                              | 45            | 35.9          | 29.6          | 57.1          | 74.7                               | 36            | 60            | 28.6          | 54.2         | 100 |
|                                  |                 | PD002                              | 24.8          | 12.3          | 8.6           | 41.5          | 53.1                               | 37.9          | 38.6          | 9.8           | 80.8         | 65  |
|                                  |                 | PD003                              | 22            | 7.5           | 5.8           | 54.7          | 30.9                               | 28            | 26.9          | 33.3          | *            | 25  |
| PD004                            |                 | 21.6                               | 7             | 9             | 49.8          | 48.7          | 43                                 | 22.9          | 53.8          | *             | 75           |     |
| PD005                            |                 | 13.8                               | 3.9           | 7.9           | 29.3          | 35.2          | 42.5                               | 22.2          | 47.5          | 55.6          | 36.4         |     |
| PD006                            |                 | 25.2                               | 8             | 10.8          | 64.5          | 39.9          | 51                                 | 44.1          | 37            | 50            | 85.3         |     |
| PD007                            |                 | 29.6                               | 7.9           | 14.5          | 37.4          | 48.5          | 77.1                               | 53.8          | 13.9          | 33.3          | 93.1         |     |
| PD008                            |                 | 32.5                               | 13.1          | 10.1          | 49.2          | 50.2          | 44.1                               | 44.4          | 28.9          | *             | 78.9         |     |
| PD009                            |                 | 7.9                                | 1.8           | 3.7           | 60.6          | 18.5          | 31.3                               | 6.3           | 13            | 100           | 73.1         |     |
| PD010                            |                 | 25.1                               | 9.4           | 18.9          | 68.3          | 40.1          | 71.8                               | 37.1          | 36.2          | 60            | 90.6         |     |
| PD011                            |                 | 9.3                                | 6.2           | 5.2           | 11.3          | 15.1          | 24.4                               | 13.2          | 2.2           | *             | 69.4         |     |
| PD012                            |                 | 21.7                               | 4.1           | 11.1          | 40.7          | 58            | 44.3                               | *             | 7.7           | 50            | 84.9         |     |
| PD014                            |                 | 37.3                               | 10.9          | 4.5           | 45.7          | 79.3          | 39.8                               | 26            | 13.9          | 22.2          | 60           |     |
| PD015                            |                 | 53.6                               | 45.6          | 12.7          | 32            | 84.9          | 36.8                               | 14.2          | 25            | 10.5          | 46.1         |     |
| PD017                            |                 | 25.4                               | 12.4          | 5.8           | 29.3          | 49.1          | 33                                 | 38            | 34.4          | 14.3          | 29.4         |     |
| PD018                            |                 | 49                                 | 44.3          | 33.9          | 37.9          | 76.5          | 54.7                               | 63.2          | 18.4          | 38.7          | 77.2         |     |
| PD019                            |                 | 8.1                                | 2.5           | 0.9           | 5.2           | 19.9          | 2.1                                | 1.6           | 6.9           | *             | 1.2          |     |
| PD020                            |                 | 39.2                               | 13.5          | 13            | 39.4          | 77.1          | 30.3                               | 38.9          | 25            | 50            | 20           |     |
| PD021                            |                 | 50.1                               | 28.9          | 18.9          | 27.5          | 87.6          | 66.2                               | 45.2          | 30            | 6.7           | 78.6         |     |
| PD022                            |                 | 39.3                               | 14.6          | 4.9           | 14.3          | 75.5          | 30.5                               | 40.3          | 13.2          | 14.4          | 44.3         |     |
| PD023                            |                 | 24.4                               | 7.4           | 1.4           | 19.9          | 47.2          | 62.3                               | 24.6          | 6.1           | *             | 94.4         |     |
| <b>Averages</b>                  |                 | <b>28.80</b>                       | <b>14.15</b>  | <b>11.01</b>  | <b>38.84</b>  | <b>52.86</b>  | <b>42.24</b>                       | <b>33.08</b>  | <b>23.09</b>  | <b>42.71</b>  | <b>63.23</b> |     |
| <b>StDev</b>                     |                 | <b>13.67</b>                       | <b>13.05</b>  | <b>8.51</b>   | <b>17.44</b>  | <b>22.36</b>  | <b>17.34</b>                       | <b>16.95</b>  | <b>14.22</b>  | <b>26.67</b>  | <b>27.91</b> |     |
| <b>T Tests: HIV+ to Controls</b> | <b>0.6806</b>   | <b>0.3643</b>                      | <b>0.7212</b> | <b>0.3841</b> | <b>0.8163</b> | <b>0.0022</b> | <b>0.0000</b>                      | <b>0.0005</b> | <b>0.0479</b> | <b>0.0228</b> |              |     |

\* - Insufficient Data for Analysis

## Supplemental Table 2

| Group   | Sample ID      | V $\gamma$ 2 Frequency |              | GrB+ V $\gamma$ 2 Cells |              |
|---------|----------------|------------------------|--------------|-------------------------|--------------|
|         |                | Day 00                 | Day 14       | Day 00                  | Day 14       |
| Control | ND001          | 2.4                    | 87.2         | 89.8                    | 98.2         |
|         | ND006          | 1.8                    | 47.7         | 68.4                    | 89.7         |
|         | ND007          | 1.7                    | 58.2         | 78.4                    | 98.3         |
|         | ND015          | 5.4                    | 60.7         | 77.5                    | 62.6         |
|         | ND018          | 1.1                    | 31.6         | 45.9                    | 43.1         |
|         | ND019          | 10.2                   | 89.5         | 86.9                    | 46.1         |
|         | ND020          | 1.0                    | 25.5         | 34.8                    | 97.5         |
|         | <b>Average</b> | <b>3.37</b>            | <b>57.20</b> | <b>68.81</b>            | <b>76.50</b> |
|         | <b>StDev</b>   | <b>3.36</b>            | <b>24.86</b> | <b>20.88</b>            | <b>25.15</b> |
| HIV+    | PD001          | 2.3                    | 23.5         | 34.4                    | 96.1         |
|         | PD003          | 0.4                    | 1.9          | 28.0                    | 93.8         |
|         | PD006          | 0.1                    | 5.9          | 51.0                    | 97.9         |
|         | PD007          | 0.1                    | 6.6          | 77.1                    | 70.7         |
|         | PD009          | 0.1                    | 0.4          | 31.3                    | 36.4         |
|         | PD010          | 1.0                    | 64.5         | 71.8                    | 61.7         |
|         | <b>Average</b> | <b>0.67</b>            | <b>17.15</b> | <b>48.93</b>            | <b>76.10</b> |
|         | <b>StDev</b>   | <b>0.87</b>            | <b>24.62</b> | <b>21.36</b>            | <b>24.50</b> |

\* p < 0.05
